# Supplementary material for: A highly stable metal–organic framework with cubane-like clusters for the selective oxidation of aryl alkenes to aldehydes or ketones
Source: Royal Society of Chemistry journal article supplement (doi:10.1039/d1ce00545f), 2021-01-01
Supplement: d1ce00545f1.pdf [file d1ce00545f1.pdf]

## A highly stable metal-organic framework with cubane-like clusters for selective oxidation of aryl alkenes to aldehydes or ketones

Teng Liu,<sup>a</sup> Xianfu Shen,<sup>a</sup> Xiang Shen,<sup>a</sup> Chixian He,<sup>a</sup> Jiaming Liu,<sup>b</sup> Jian-Jun Liu<sup>\*a</sup>

<sup>a</sup>College of Chemistry and Environmental Science, Qujing Normal University, Qujing 655011, China. E-mail: jjliu302@163.com

<sup>b</sup>School of Metallurgy Engineering, Jiangxi University of Science and Technology, Ganzhou 341000, China.

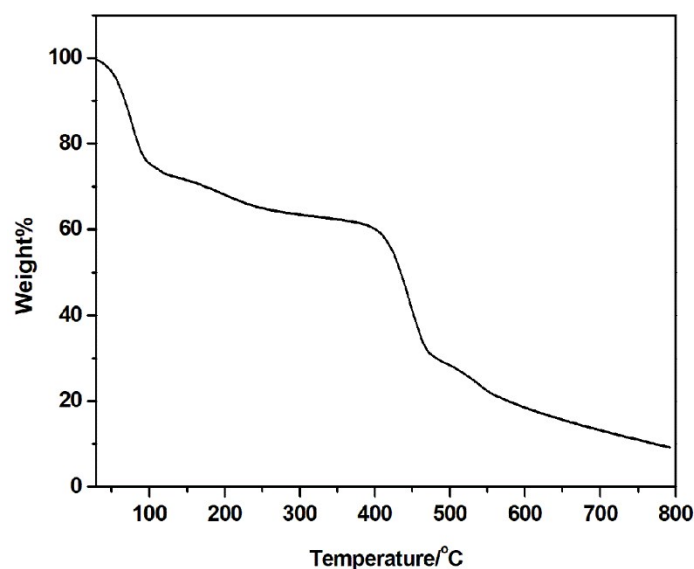

Figure S1. The TGA curve of compound 1.

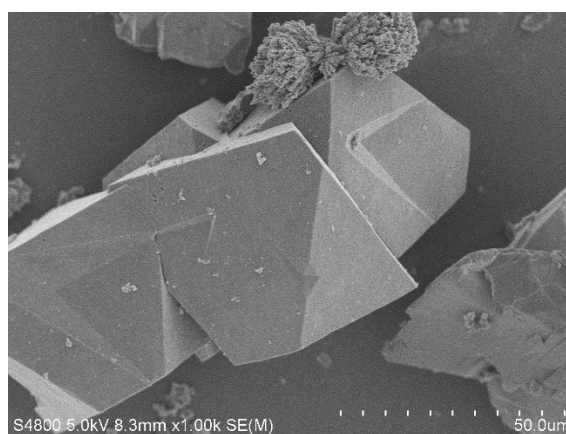

Figure S2. The SEM image of compound 1.

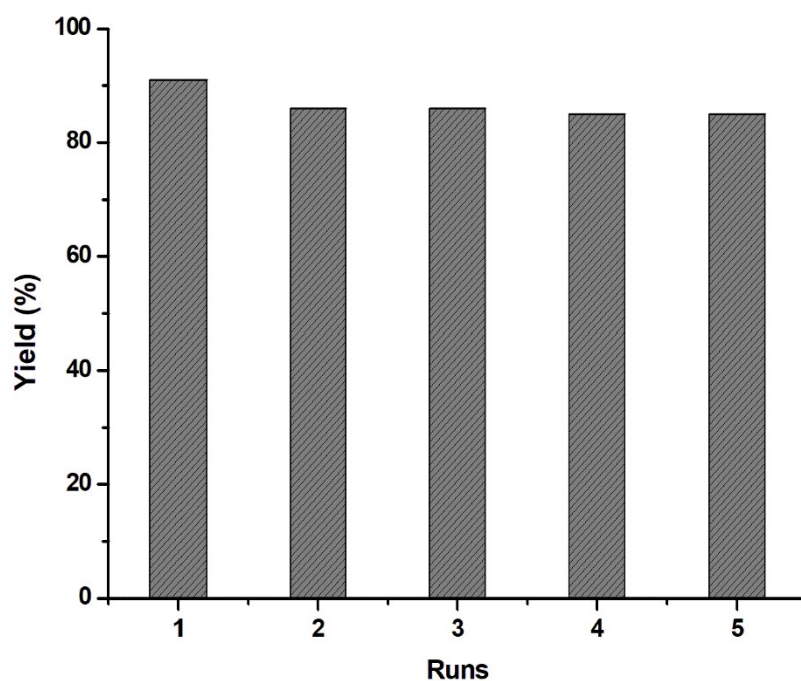

Figure S3. The recycle experiments for styrene oxidation to benzaldehyde by using compound 1 as catalyst.

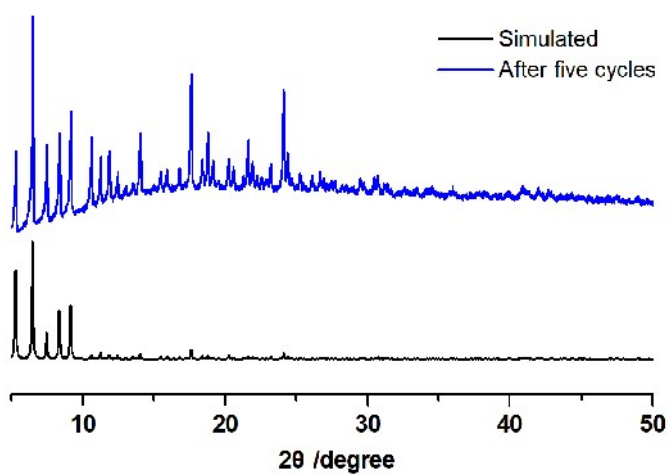

Figure S4. The PXRD patterns of compound 1 after seven cycles.

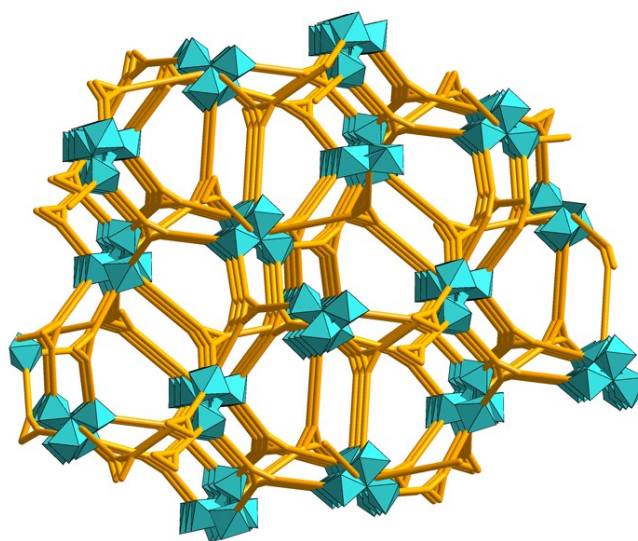

Figure S5. The 3D (3,9)-connected self-interpenetrating framework of compound 1;  $[\text{Co}_4(\text{SO}_4)(\text{F})_3]^{3+}$  cluster can be viewed as a 9-connecting node, while both tpt pairs and  $\text{tatb}^{3-}$  ligands can be viewed as 3-connecting triangles.

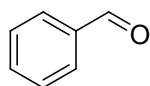

**3a**

$^1\text{H}$  NMR (400 MHz,  $\text{CDCl}_3$ ):  $\delta$  = 10.03 (s, 1H, ArCHO), 7.90 (d,  $J$  = 8.0 Hz, 2H, ArH) 7.63-7.67 (m, 1H, ArH), 7.53-7.57 (m, 2H, ArH);  $^{13}\text{C}$  NMR (100 MHz,  $\text{CDCl}_3$ ):  $\delta$  = 192.5, 136.4, 134.5, 129.8, 129.0.

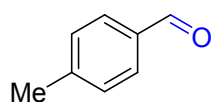

**3b**

$^1\text{H}$  NMR (400 MHz,  $\text{CDCl}_3$ ):  $\delta$  = 9.96 (s, 1H, ArCHO), 7.78 (d,  $J$  = 8.0 Hz, 2H, ArH) 7.33 (d,  $J$  = 7.6 Hz, 2H, ArH), 2.44 (s, 3H, ArCH<sub>3</sub>);  $^{13}\text{C}$  NMR (100 MHz,  $\text{CDCl}_3$ ):  $\delta$  = 192.1, 145.6, 134.2, 129.9, 129.7, 21.9.

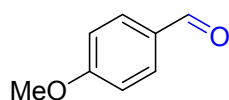

**3c**

$^1\text{H}$  NMR (400 MHz,  $\text{CDCl}_3$ ):  $\delta$  = 9.89 (s, 1H, ArCHO), 7.85 (d,  $J$  = 8.8 Hz, 2H, ArH) 7.00 (d,  $J$  = 8.8 Hz, 2H, ArH), 3.89 (s, 3H, ArOCH<sub>3</sub>);  $^{13}\text{C}$  NMR (100 MHz,  $\text{CDCl}_3$ ):  $\delta$

= 190.9, 164.6, 132.0, 129.9, 114.3, 55.6.

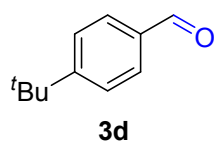

$^1\text{H}$  NMR (400 MHz,  $\text{CDCl}_3$ ):  $\delta$  = 9.99 (s, 1H, ArCHO), 7.83 (d,  $J$  = 8.4 Hz, 2H, ArH) 7.56 (d,  $J$  = 8.4 Hz, 2H, ArH), 1.36 (s, 3H, Ar'tBu);  $^{13}\text{C}$  NMR (100 MHz,  $\text{CDCl}_3$ ):  $\delta$  = 192.2, 158.5, 134.0, 129.7, 126.0, 35.4, 31.1.

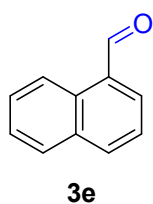

$^1\text{H}$  NMR (400 MHz,  $\text{CDCl}_3$ ):  $\delta$  = 10.36 (s, 1H, ArCHO), 9.24-9.26 (m, 1H, ArH), 8.07 (d,  $J$  = 8.0 Hz, 1H, ArH), 7.96 (d,  $J$  = 7.2 Hz, 1H, ArH), 7.90 (d,  $J$  = 8.4 Hz, 1H, ArH), 7.65-7.70 (m, 1H, ArH), 7.55-7.62 (m, 2H, ArH);  $^{13}\text{C}$  NMR (100 MHz,  $\text{CDCl}_3$ ):  $\delta$  = 193.7, 136.9, 135.4, 133.7, 131.4, 130.5, 129.1, 128.5, 127.0, 124.9.

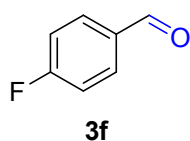

$^1\text{H}$  NMR (400 MHz,  $\text{CDCl}_3$ ):  $\delta$  = 9.98 (s, 1H, ArCHO), 7.90-7.94 (m, 2H, ArH), 7.20-7.25 (m, 2H, ArH);  $^{13}\text{C}$  NMR (100 MHz,  $\text{CDCl}_3$ ):  $\delta$  = 190.6, 167.8, 165.3, 132.9, 132.3, 116.5, 116.3.

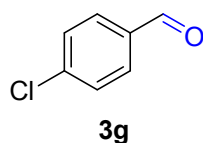

$^1\text{H}$  NMR (400 MHz,  $\text{CDCl}_3$ ):  $\delta$  = 9.99 (s, 1H, ArCHO), 7.84 (d,  $J$  = 8.4 Hz, 2H, ArH), 7.53 (d,  $J$  = 8.4 Hz, 2H, ArH);  $^{13}\text{C}$  NMR (100 MHz,  $\text{CDCl}_3$ ):  $\delta$  = 191.0, 134.6, 130.9, 129.5.

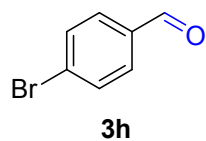

$^1\text{H}$  NMR (400 MHz,  $\text{CDCl}_3$ ):  $\delta$  = 9.98 (s, 1H, ArCHO), 7.75-7.77 (m, 2H, ArH), 7.69-

7.71 (m, 2H, ArH);  $^{13}\text{C}$  NMR (100 MHz,  $\text{CDCl}_3$ ):  $\delta = 191.2, 135.0, 132.5, 131.0, 129.8$ .

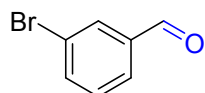

**3i**

$^1\text{H}$  NMR (400 MHz,  $\text{CDCl}_3$ ):  $\delta = 9.97$  (s, 1H, ArCHO), 8.02 (s, 1H, ArH), 7.82 (d,  $J = 7.6$  Hz, 1H, ArH), 7.75-7.77 (m, 1H, ArH), 7.41-7.45 (m, 1H, ArH);  $^{13}\text{C}$  NMR (100 MHz,  $\text{CDCl}_3$ ):  $\delta = 190.9, 137.9, 137.4, 132.4, 130.7, 128.4, 123.4$ .

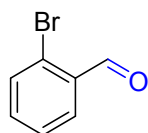

**3j**

$^1\text{H}$  NMR (400 MHz,  $\text{CDCl}_3$ ):  $\delta = 10.38$  (s, 1H, ArCHO), 7.92-7.94 (m, 1H, ArH), 7.65-7.68 (m, 1H, ArH), 7.44-7.47 (m, 2H, ArH);  $^{13}\text{C}$  NMR (100 MHz,  $\text{CDCl}_3$ ):  $\delta = 192.0, 135.4, 133.9, 133.4, 129.9, 128.0, 127.2$ .

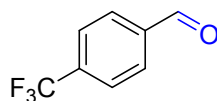

**3k**

$^1\text{H}$  NMR (400 MHz,  $\text{CDCl}_3$ ):  $\delta = 10.11$  (s, 1H, ArCHO), 8.02 (d,  $J = 8.0$  Hz, 2H, ArH), 7.82 (d,  $J = 8.0$  Hz, 2H, ArH);  $^{13}\text{C}$  NMR (100 MHz,  $\text{CDCl}_3$ ):  $\delta = 191.2, 138.6, 136.1$  ( $J = 32.5$  Hz), 129.9, 126.1, 122.1 ( $J = 271.3$  Hz).

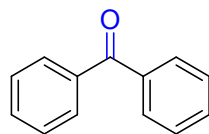

**3l**

$^1\text{H}$  NMR (400 MHz,  $\text{CDCl}_3$ ):  $\delta = 7.81$  (d,  $J = 7.6$  Hz, 4H, ArH), 7.58-7.61 (m, 2H, ArH), 7.47-7.50 (m, 4H, ArH);  $^{13}\text{C}$  NMR (100 MHz,  $\text{CDCl}_3$ ):  $\delta = 196.9, 137.6, 132.5, 130.1, 128.3$ .

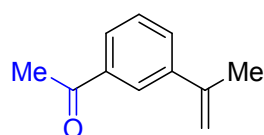

**3m**

$^1\text{H}$  NMR (400 MHz,  $\text{CDCl}_3$ ):  $\delta$  = 8.05 (s, 1H, ArH), 7.86 (d,  $J$  = 7.6 Hz, 1H, ArH), 7.67 (d,  $J$  = 7.6 Hz, 1H, ArH), 7.43 (t,  $J$  = 7.6 Hz, 1H, ArH), 5.44 (s, 1H,  $\text{CH}_2$ ), 5.17 (s, 1H,  $\text{CH}_2$ ), 2.63 (s, 3H,  $\text{CH}_3$ ), 2.19 (s, 3H,  $\text{CH}_3$ );  $^{13}\text{C}$  NMR (100 MHz,  $\text{CDCl}_3$ ):  $\delta$  = 198.4, 142.5, 141.7, 137.1, 130.2, 128.5, 127.4, 125.2, 113.7, 26.8, 21.8.

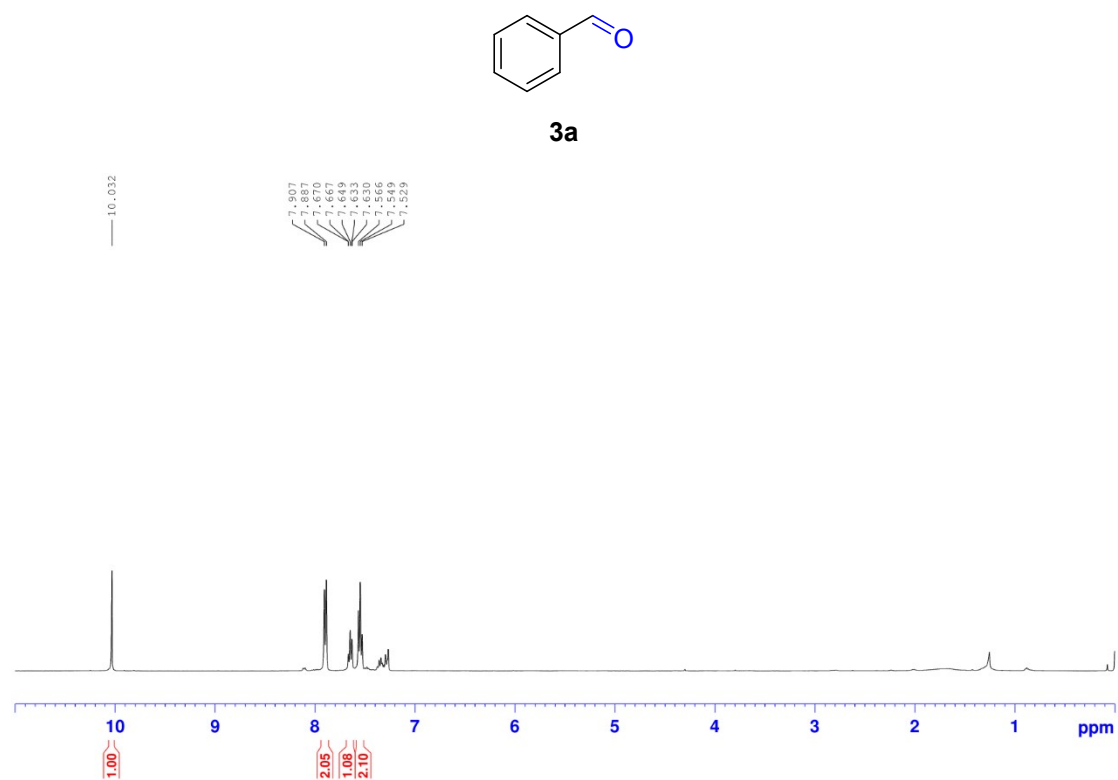

Figure S6.  $^1\text{H}$  NMR (400 MHz,  $\text{CDCl}_3$ ) spectra of compound **3a**

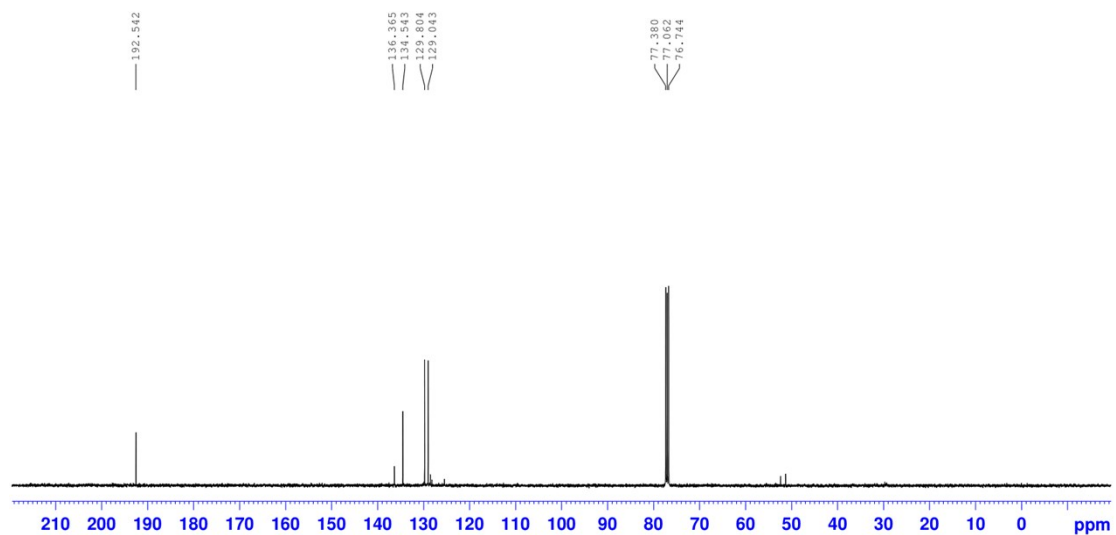

Figure S7. <sup>13</sup>C NMR (100 MHz, CDCl<sub>3</sub>) spectra of compound **3a**

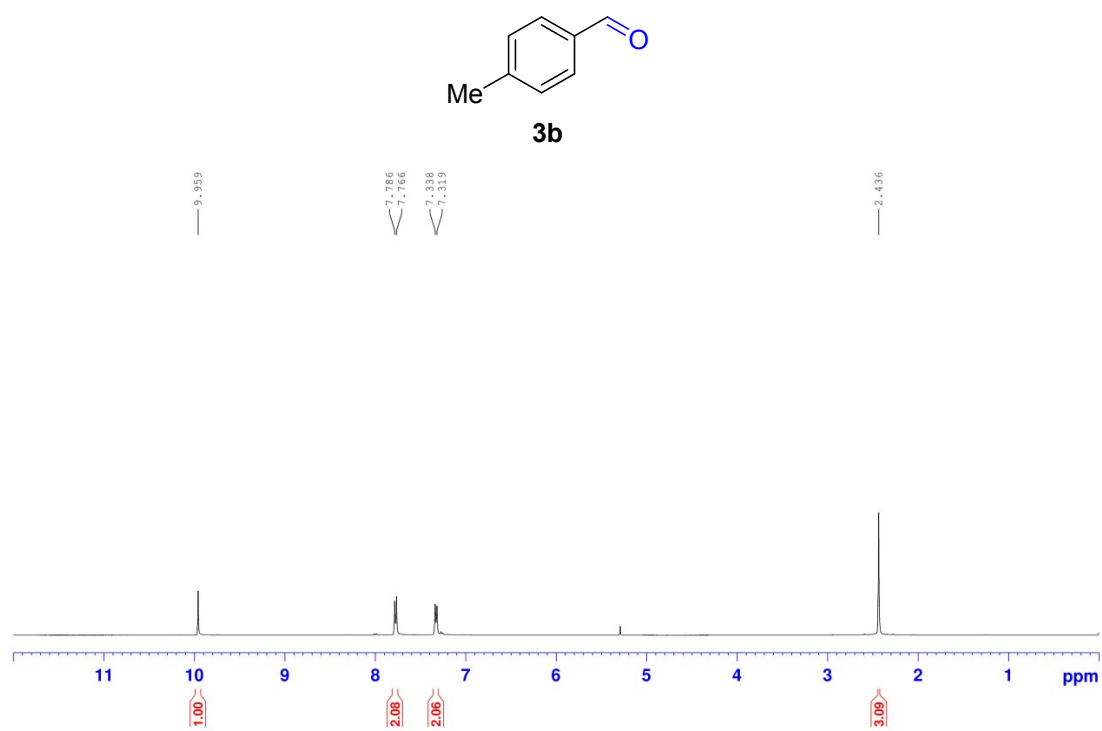

Figure S8. <sup>1</sup>H NMR (400 MHz, CDCl<sub>3</sub>) spectra of compound **3b**

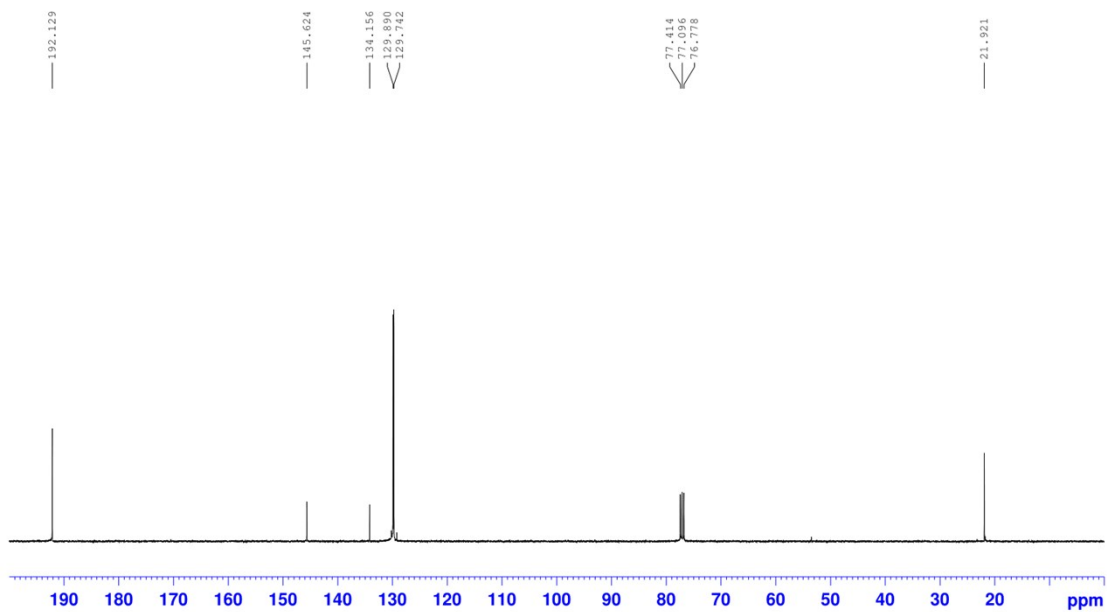

Figure S9.  $^{13}\text{C}$  NMR (100 MHz,  $\text{CDCl}_3$ ) spectra of compound **3b**

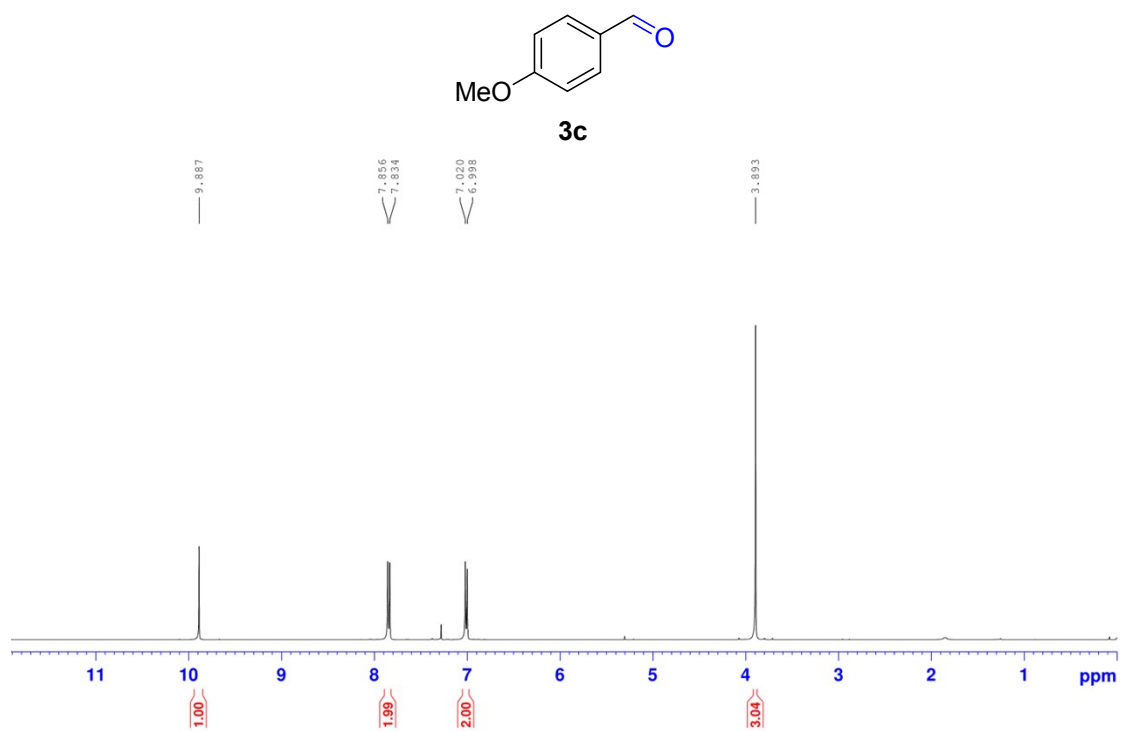



Figure S10.  $^1\text{H}$  NMR (400 MHz,  $\text{CDCl}_3$ ) spectra of compound **3c**

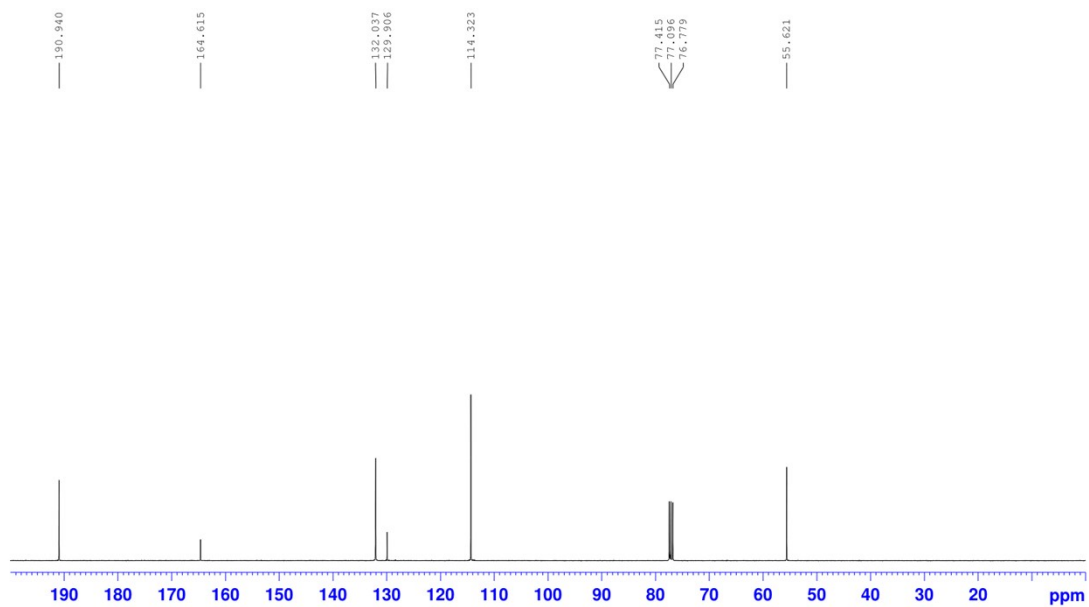

Figure S11.  $^{13}\text{C}$  NMR (100 MHz,  $\text{CDCl}_3$ ) spectra of compound **3c**

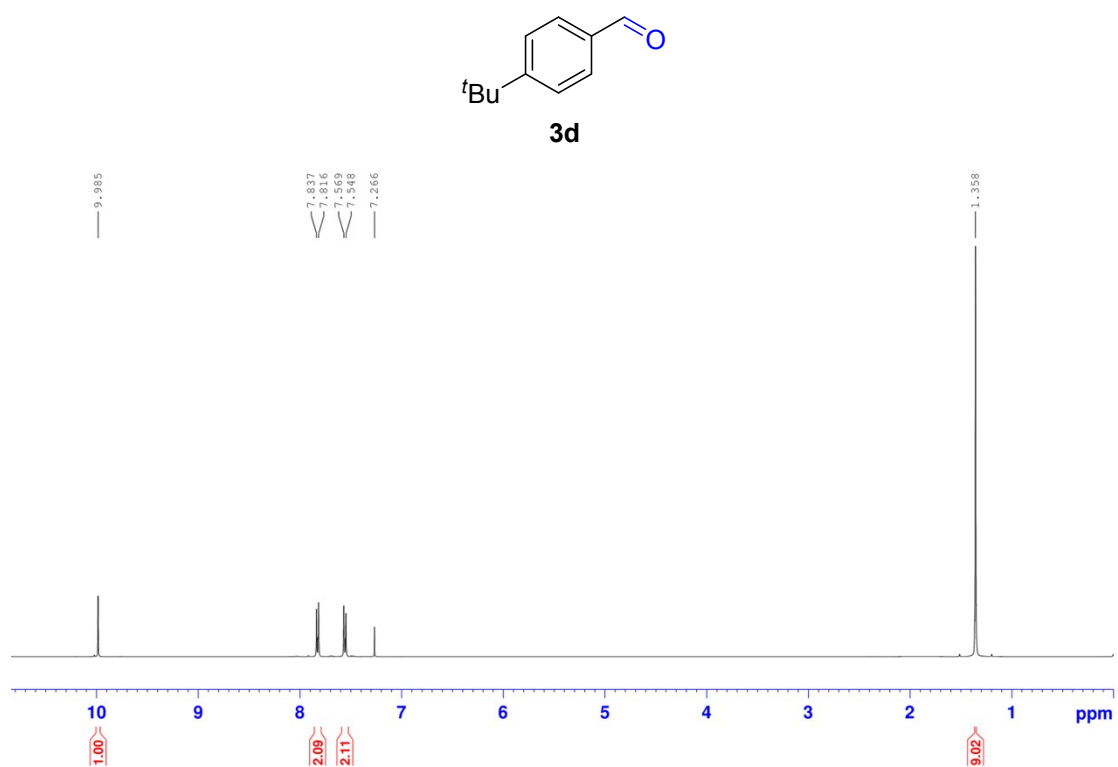

Figure S12.  $^1\text{H}$  NMR (400 MHz,  $\text{CDCl}_3$ ) spectra of compound **3d**

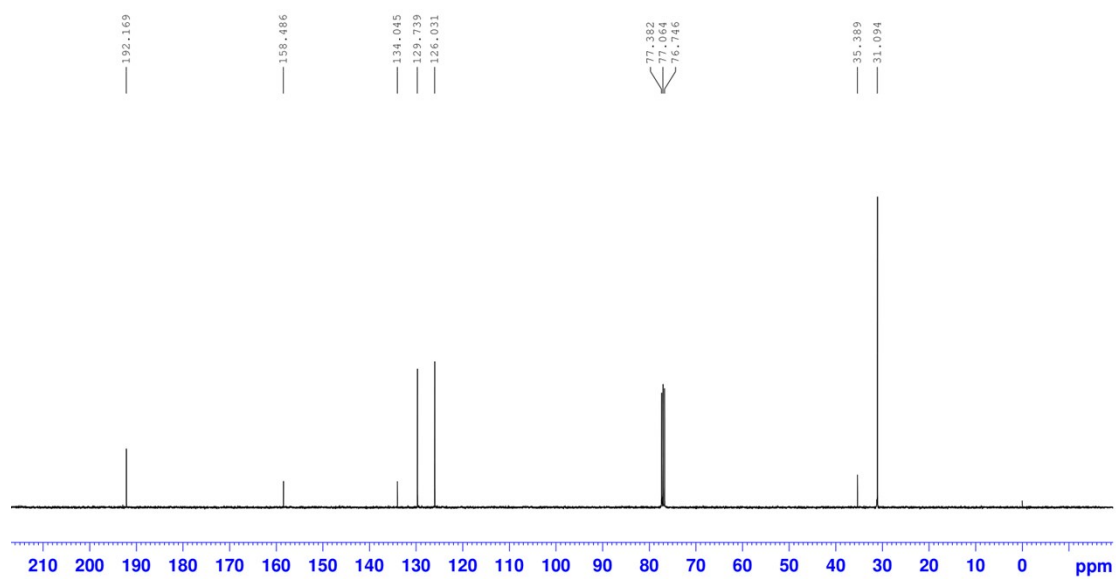

Figure S13.  $^{13}\text{C}$  NMR (100 MHz,  $\text{CDCl}_3$ ) spectra of compound **3d**

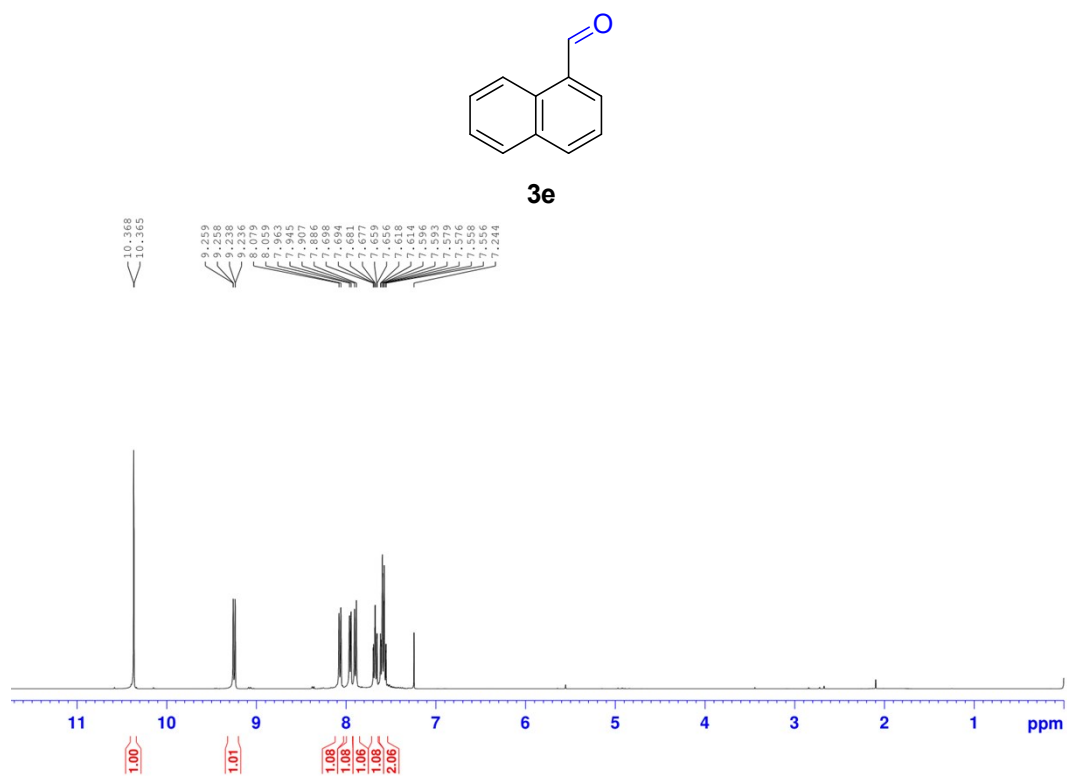

Figure S14.  $^1\text{H}$  NMR (400 MHz,  $\text{CDCl}_3$ ) spectra of compound **3e**

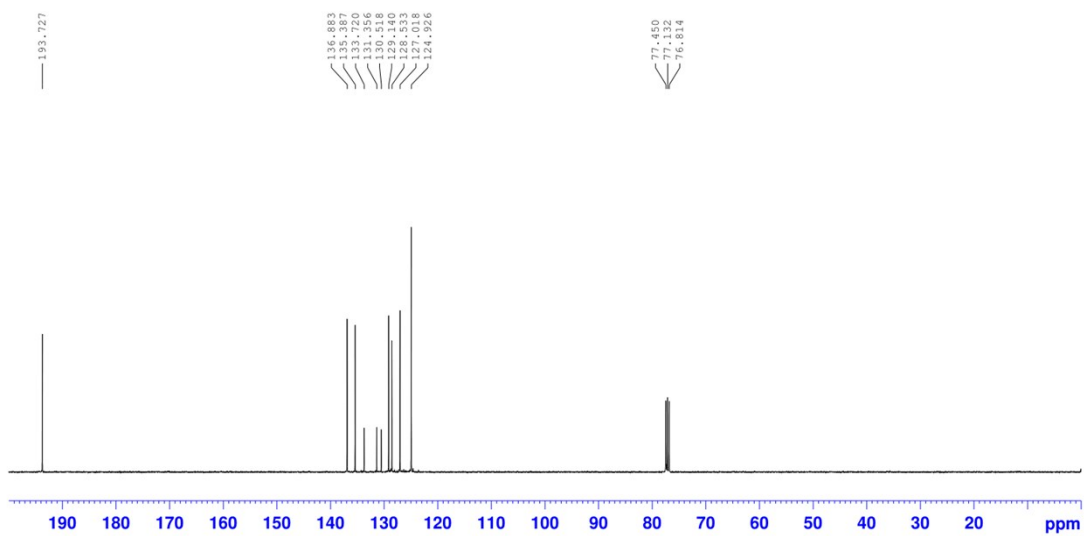

Figure S15. <sup>13</sup>C NMR (100 MHz, CDCl<sub>3</sub>) spectra of compound **3e**

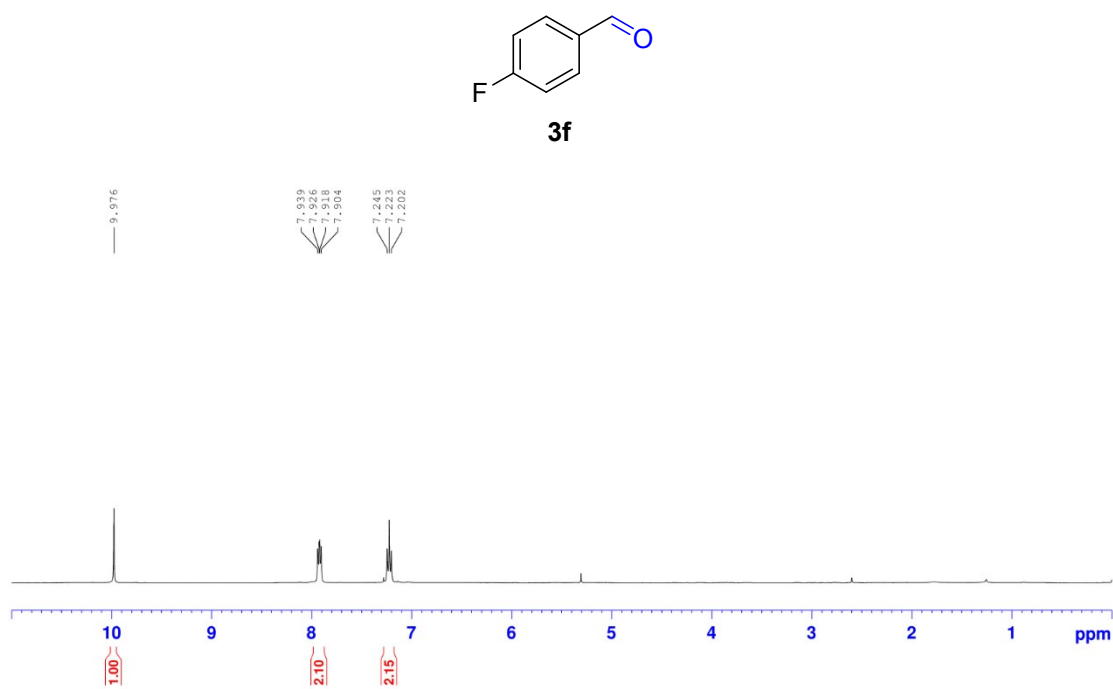

Figure S16. <sup>1</sup>H NMR (400 MHz, CDCl<sub>3</sub>) spectra of compound **3f**

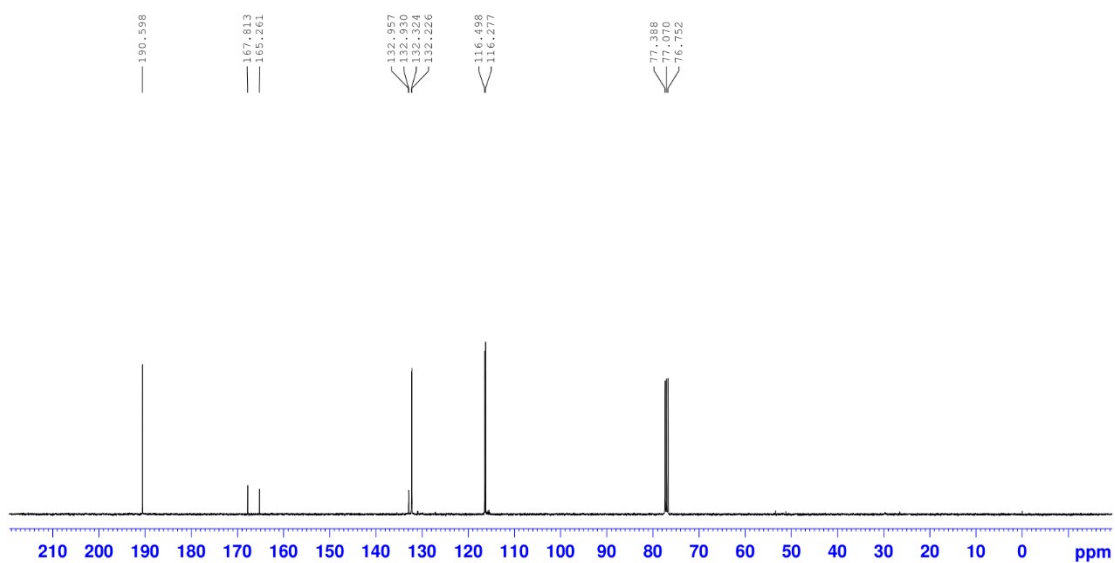

Figure S17.  $^{13}\text{C}$  NMR (100 MHz,  $\text{CDCl}_3$ ) spectra of compound **3f**

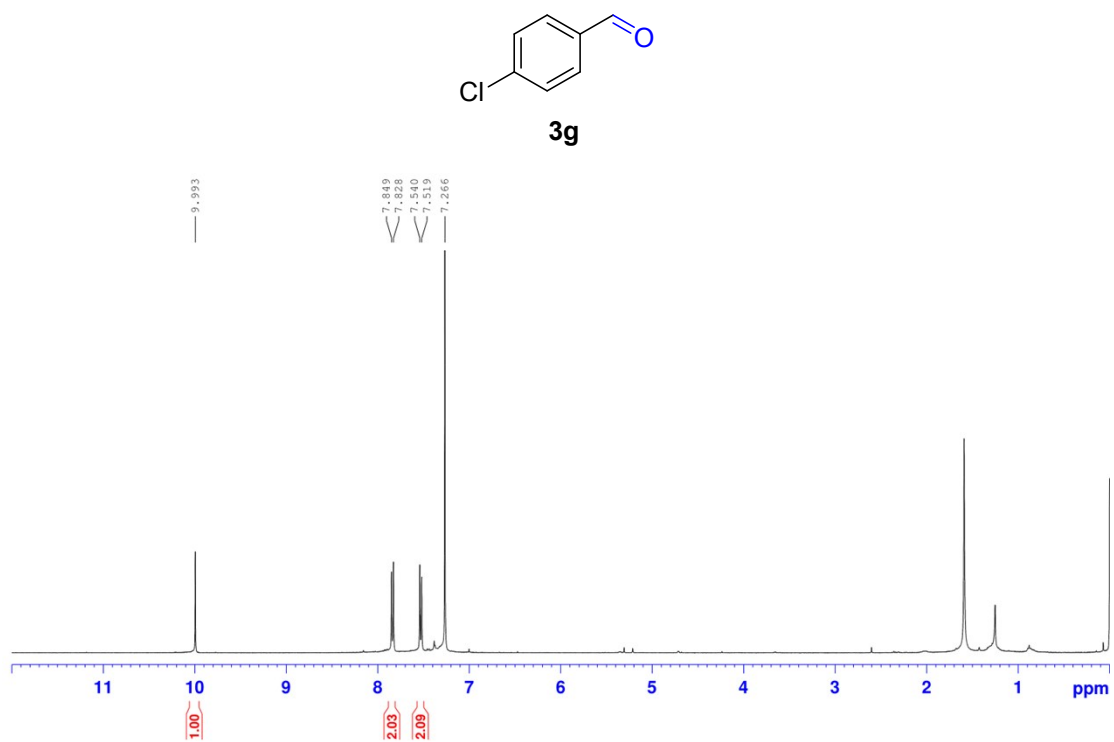

Figure S18.  $^1\text{H}$  NMR (400 MHz,  $\text{CDCl}_3$ ) spectra of compound **3g**

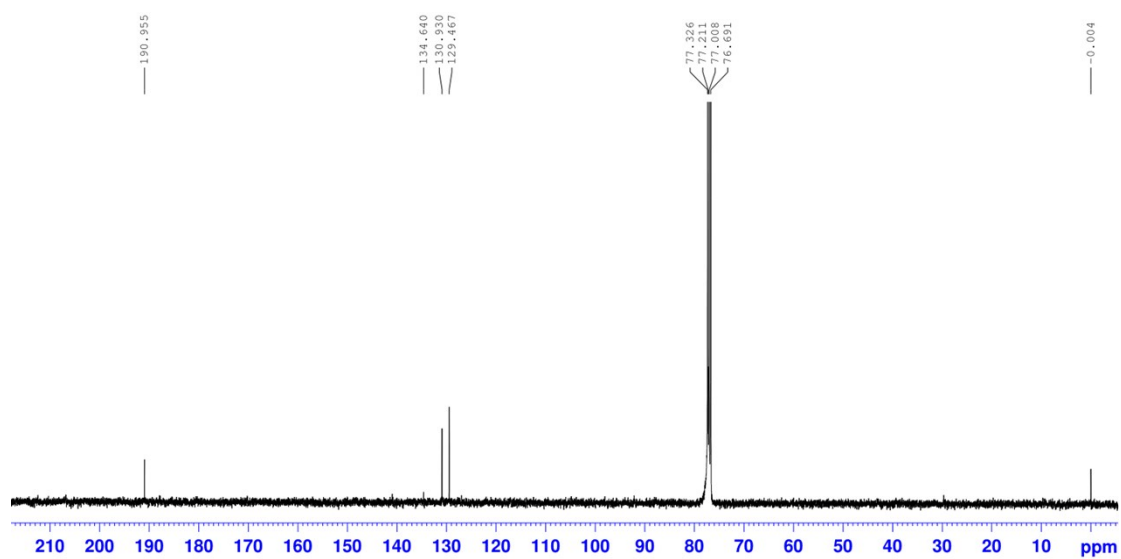

Figure S19.  $^{13}\text{C}$  NMR (100 MHz,  $\text{CDCl}_3$ ) spectra of compound **3g**

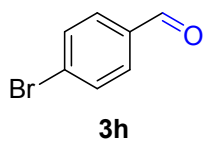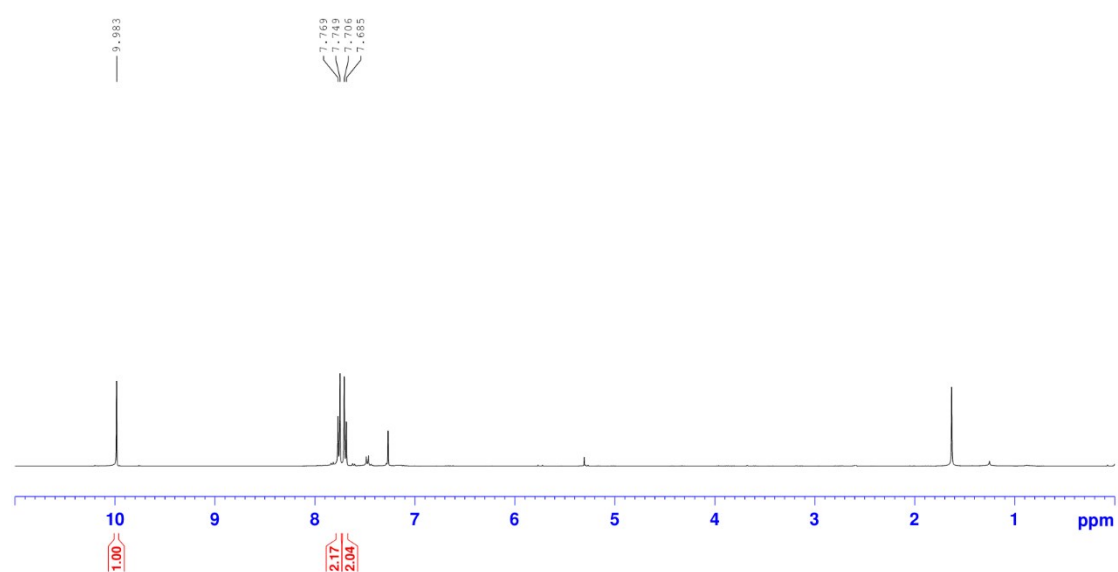

Figure S20.  $^1\text{H}$  NMR (400 MHz,  $\text{CDCl}_3$ ) spectra of compound **3h**

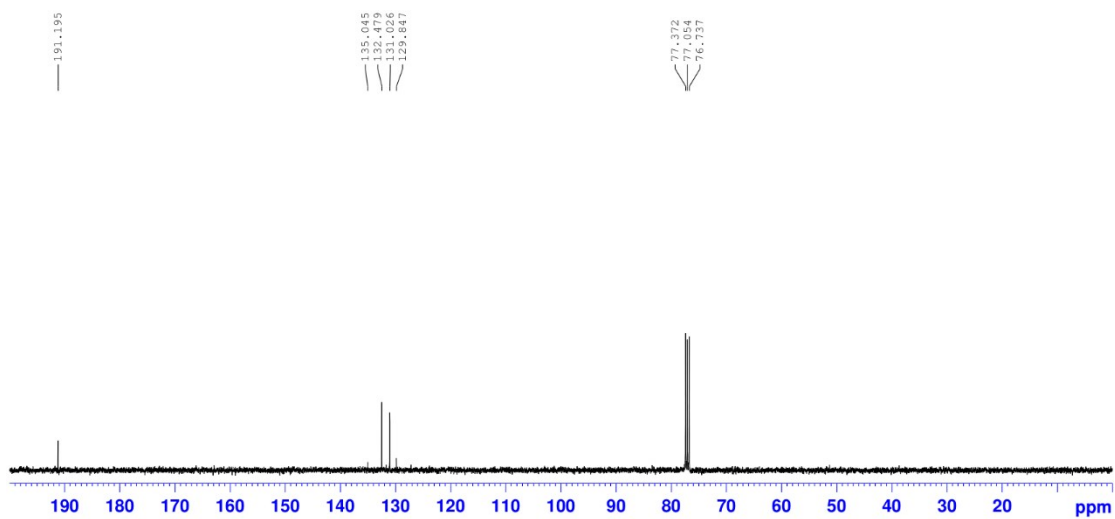

Figure S21.  $^{13}\text{C}$  NMR (100 MHz,  $\text{CDCl}_3$ ) spectra of compound **3h**

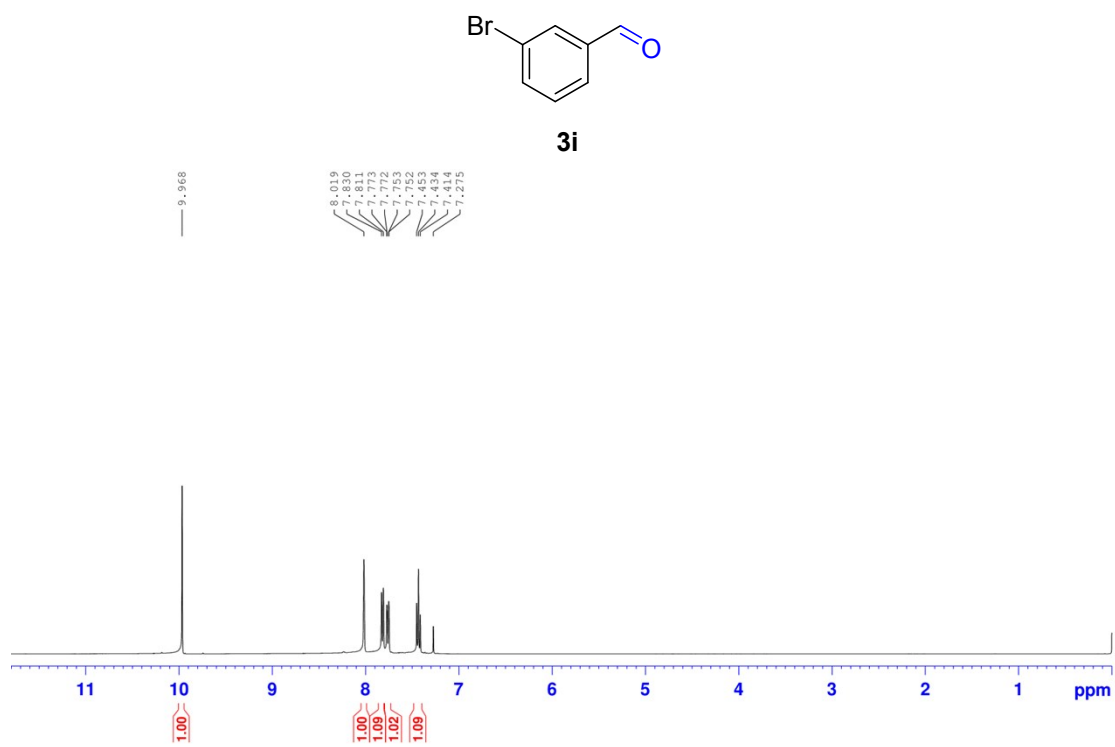

Figure S22.  $^1\text{H}$  NMR (400 MHz,  $\text{CDCl}_3$ ) spectra of compound **3i**

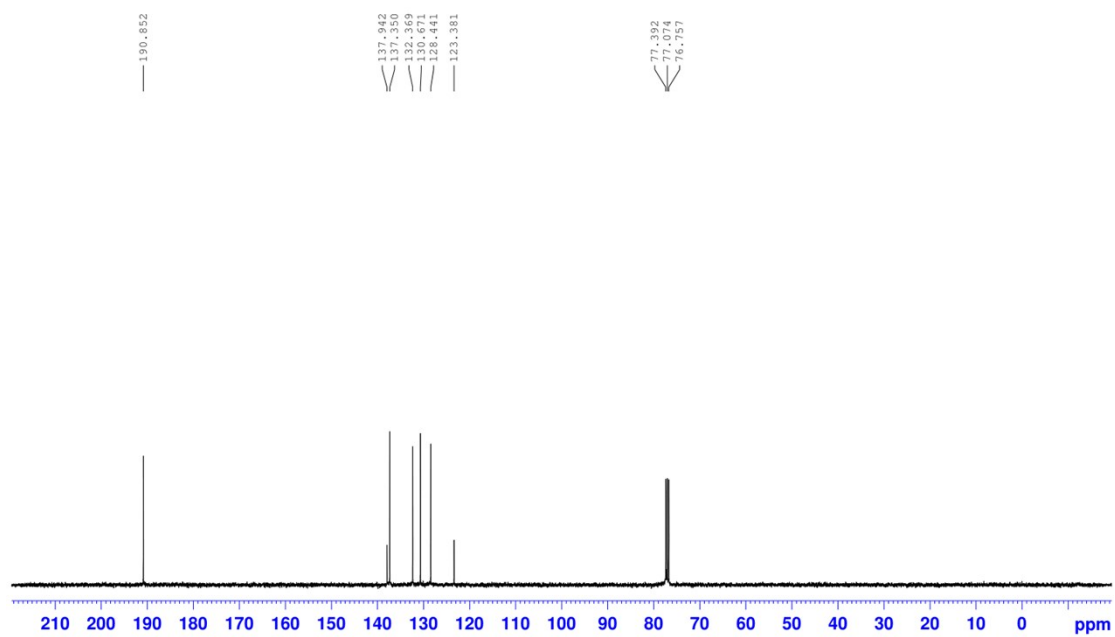

Figure 23.  $^{13}\text{C}$  NMR (100 MHz,  $\text{CDCl}_3$ ) spectra of compound **3i**

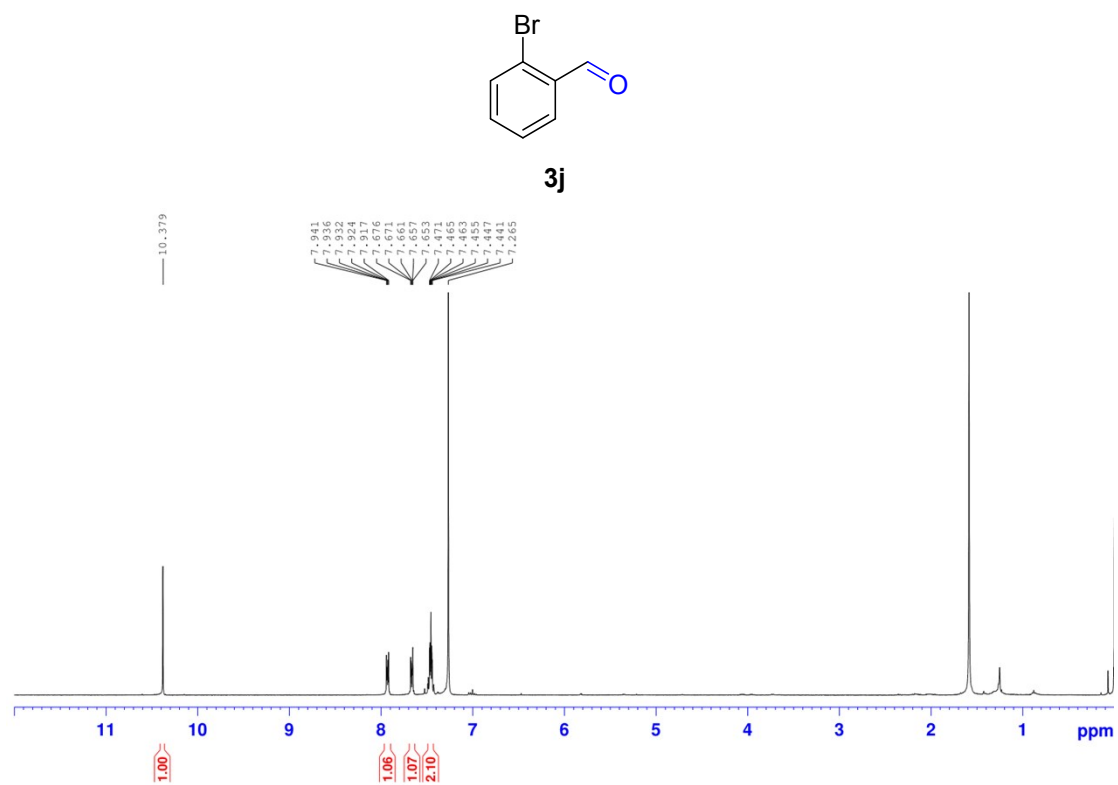

Figure S24.  $^1\text{H}$  NMR (400 MHz,  $\text{CDCl}_3$ ) spectra of compound **3j**

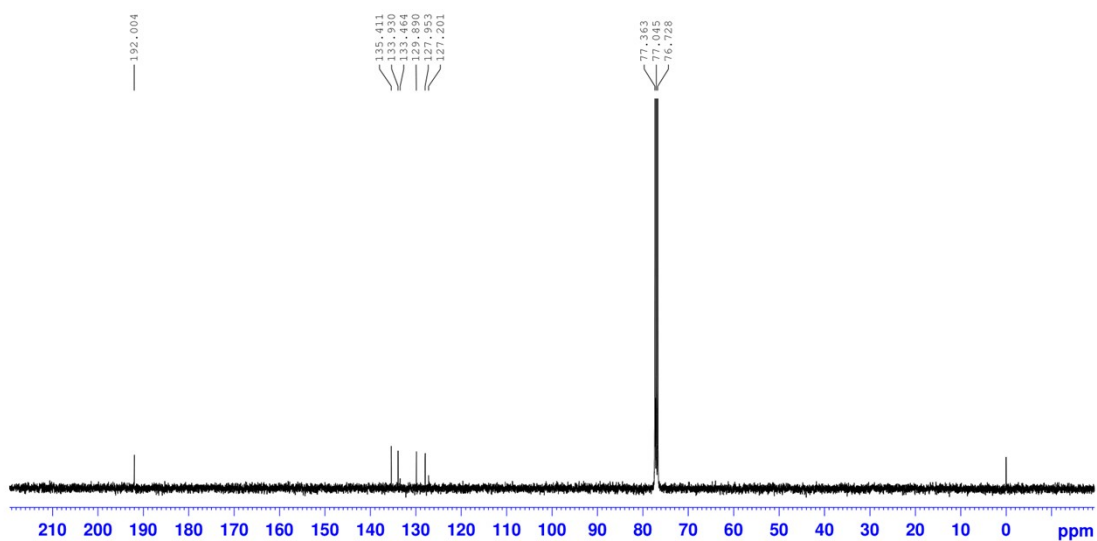

Figure 25.  $^{13}\text{C}$  NMR (100 MHz,  $\text{CDCl}_3$ ) spectra of compound **3j**

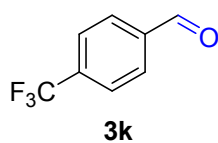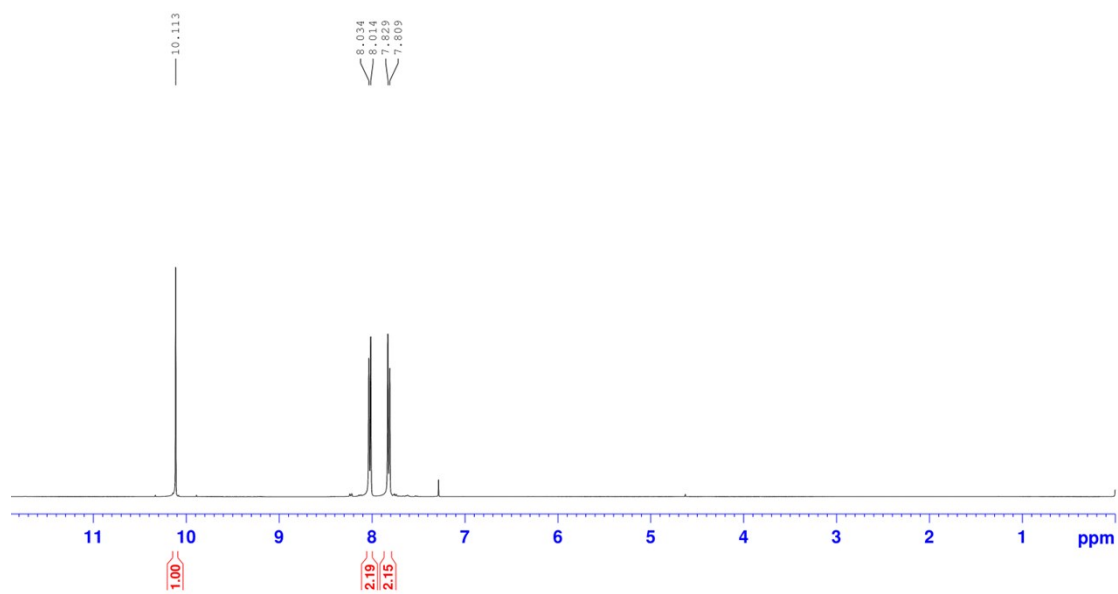

Figure S26.  $^1\text{H}$  NMR (400 MHz,  $\text{CDCl}_3$ ) spectra of compound **3k**



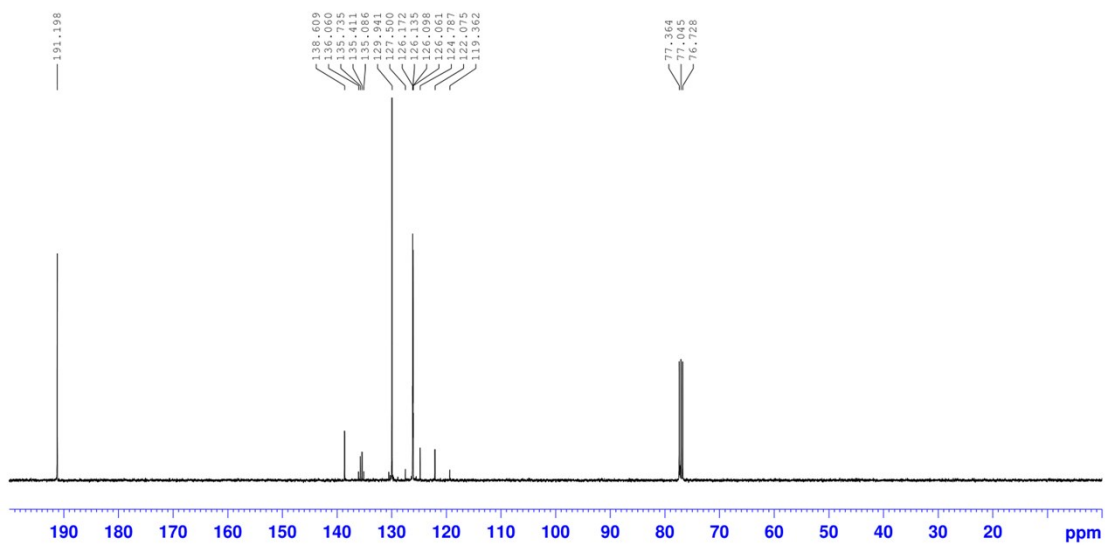

Figure S27.  $^{13}\text{C}$  NMR (100 MHz,  $\text{CDCl}_3$ ) spectra of compound **3k**

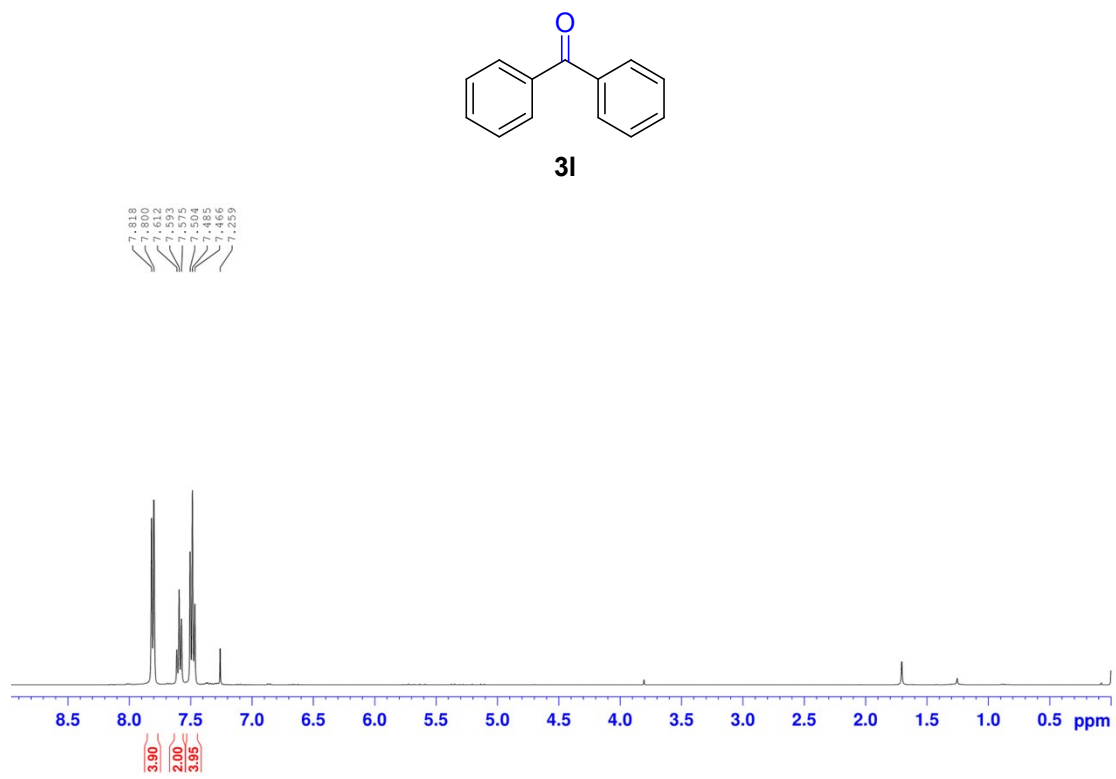

Figure S28.  $^1\text{H}$  NMR (400 MHz,  $\text{CDCl}_3$ ) spectra of compound **3l**

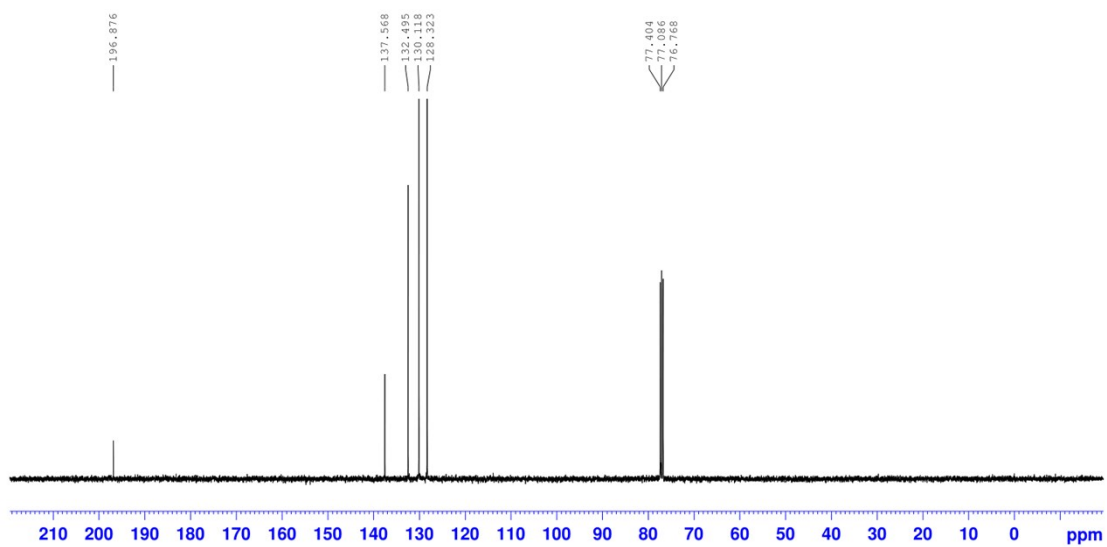

Figure S29.  $^{13}\text{C}$  NMR (100 MHz,  $\text{CDCl}_3$ ) spectra of compound **31**

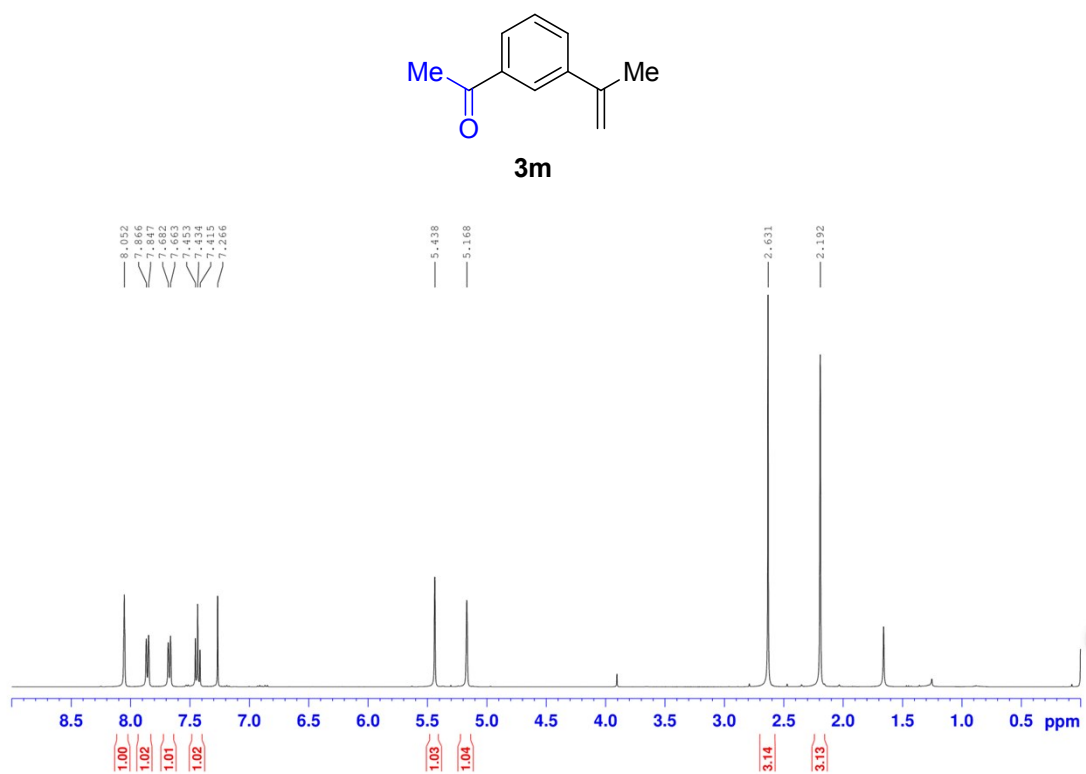

Figure S30.  $^1\text{H}$  NMR (400 MHz,  $\text{CDCl}_3$ ) spectra of compound **3m**

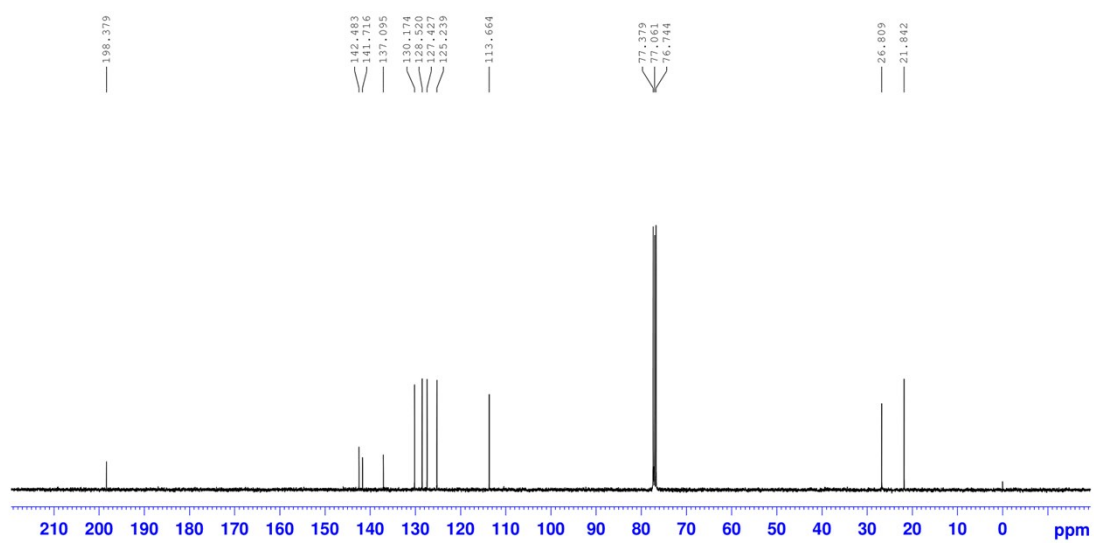

Figure S31.  $^1\text{H}$  NMR (400 MHz,  $\text{CDCl}_3$ ) spectra of compound **3m**
